# Supplementary material
Source: bioRxiv or medRxiv preprint supplement (https://www.biorxiv.org/highwire/filestream/44418/field_highwire_adjunct_files/0/149526-1.pdf)
Supplement: Supplementary file [file 149526-1.pdf]

**Supplementary Figure S1.** Creation of expression maps, labeling brain boundary (a) dividing the space into simplices (triangles in two-dimensional cases), note that not all possible triangles are marked in the image (b) linearly interpolating within each simplex (c)

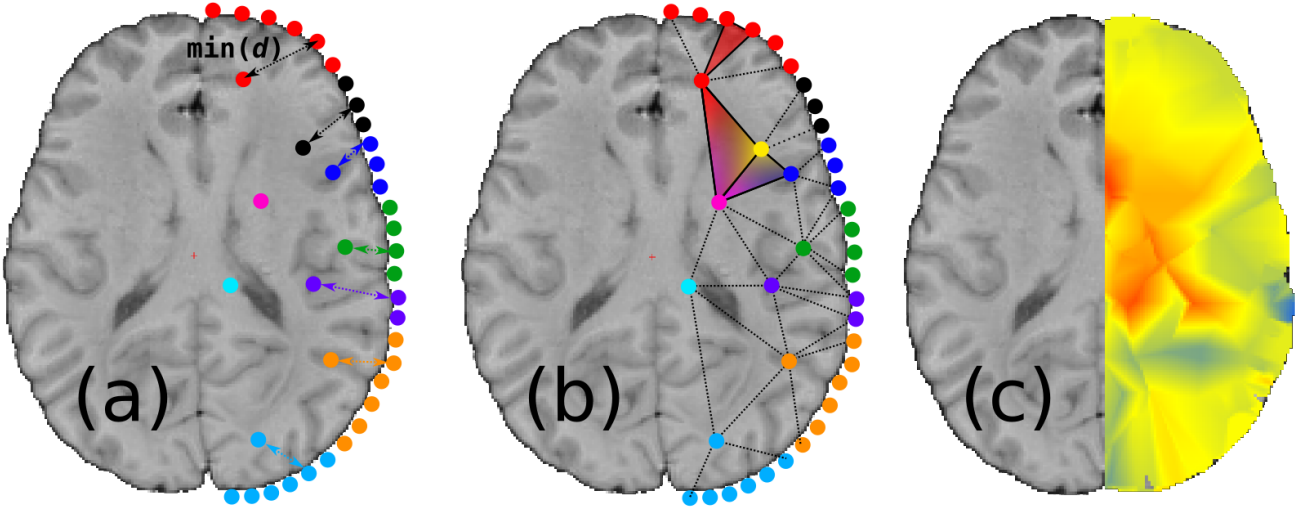

**Supplementary Figure S2.** The correlation between left and right hemisphere mRNA expression for OXTR (a), CD38 (b), and OXT (c). A line of best fit with 95% confidence region was overlaid on the scatterplots to illustrate data trends.

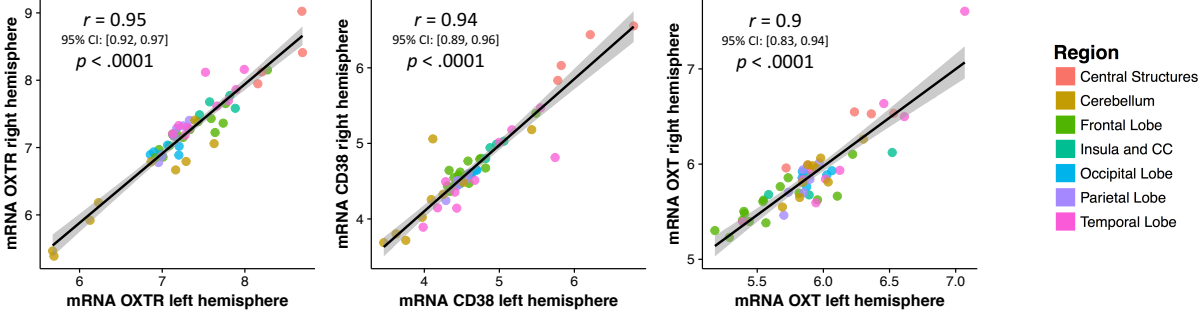

**Supplementary Figure S3. The expression of central gene expression for AVPR1A (A), DRD2 (B), and CHRM4 (C). Means and standard errors are presented. \* > 0.05 (FDR corrected).**

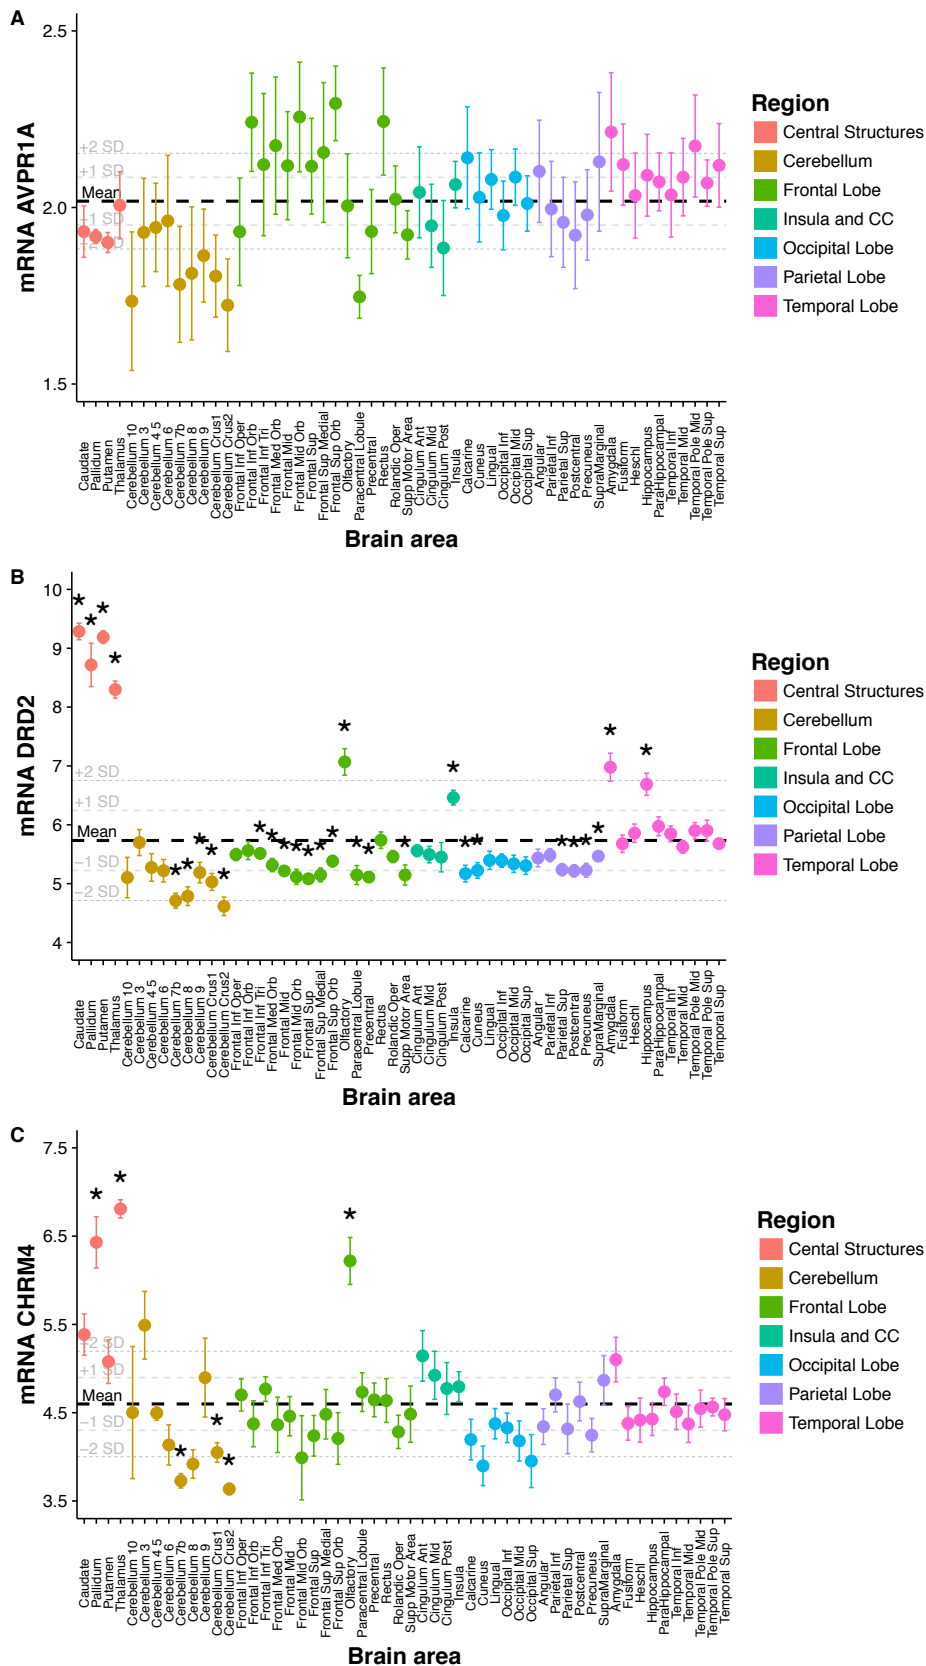

**Supplementary Table S1.** Detailed donor profiles

| <b>ID</b> | <b>Ethnicity</b> | <b>Gender</b> | <b>Age</b> | <b>Post-mortem interval (hours)</b> | <b>Number of brain samples</b> | <b>Hemisphere</b> |
|-----------|------------------|---------------|------------|-------------------------------------|--------------------------------|-------------------|
| 1         | Caucasian        | Male          | 57         | 25.5                                | 363                            | Left              |
| 2         | Caucasian        | Male          | 31         | 17.5                                | 529                            | Left              |
| 3         | Hispanic         | Female        | 49         | 30.0                                | 470                            | Left              |
| 4         | Caucasian        | Male          | 55         | 18.0                                | 501                            | Left              |
| 5         | African American | Male          | 24         | 25.0                                | 946                            | Both              |
| 6         | African American | Male          | 39         | 18.0                                | 946                            | Both              |

**Supplementary Table S2.** Expression values (mean and standard deviation) for each probe.

Probes with the least amount of spatial variability (mean/standard deviation), are highlighted in bold.

| <b>Gene</b>   | <b>Probe</b>                  | <b>Mean</b> | <b>SD</b>   | <b>Mean/SD</b> |
|---------------|-------------------------------|-------------|-------------|----------------|
| AVPR1A        | A_23_P25246                   | 2.09        | 0.70        | 2.96           |
| AVPR1A        | CUST_102_P1416408490          | 2.00        | 0.50        | 3.98           |
| <b>AVPR1A</b> | <b>CUST_12833_P1416261804</b> | <b>2.01</b> | <b>0.45</b> | <b>4.44</b>    |
| <b>CD38</b>   | <b>CUST_14657_P1416261804</b> | <b>4.45</b> | <b>0.76</b> | <b>5.85</b>    |
| CD38          | A_23_P167328                  | 4.80        | 1.13        | 4.25           |
| CHRM4         | A_23_P104845                  | 2.03        | 0.51        | 3.99           |
| CHRM4         | CUST_163_P1416408490          | 2.01        | 0.44        | 4.60           |
| <b>CHRM4</b>  | <b>CUST_10874_P1416261804</b> | <b>4.99</b> | <b>0.90</b> | <b>5.52</b>    |
| <b>DRD2</b>   | <b>CUST_240_P1416408490</b>   | <b>5.80</b> | <b>0.65</b> | <b>8.91</b>    |
| DRD2          | CUST_1807_P1417557136         | 1.66        | 0.49        | 3.35           |
| DRD2          | CUST_16111_P1416261804        | 2.43        | 0.53        | 4.56           |
| DRD2          | A_24_P283834                  | 4.84        | 0.62        | 7.79           |
| <b>OXT</b>    | <b>CUST_15240_P1416261804</b> | <b>5.58</b> | <b>0.79</b> | <b>7.09</b>    |
| OXT           | CUST_497_P1416408490          | 3.57        | 0.77        | 4.63           |
| OXT           | A_24_P382579                  | 4.80        | 1.13        | 4.25           |
| OXTR          | A_24_P337104                  | 3.01        | 0.64        | 4.68           |
| <b>OXTR</b>   | <b>A_23_P132619</b>           | <b>7.20</b> | <b>0.53</b> | <b>13.55</b>   |

**Supplementary Table 3.** Cognitive correlates of oxytocin signaling pathway genes

|                 | OXTR               |                               |          | CD38                |                               |          | OXT                          |                               |          |
|-----------------|--------------------|-------------------------------|----------|---------------------|-------------------------------|----------|------------------------------|-------------------------------|----------|
|                 | Gene               | Probe                         | <i>r</i> | Gene                | Probe                         | <i>r</i> | Gene                         | Probe                         | <i>r</i> |
| Top 10 positive | LUZP2              | <i>CUST_11002_P1416261804</i> | 0.804    | CD38                | <i>A_23_P167328</i>           | 0.891    | OXT                          | <i>A_24_P382579</i>           | 0.866    |
|                 | NTSR2              | <i>A_23_P315212</i>           | 0.797    | NTSR2               | <i>A_23_P315212</i>           | 0.837    | OXT                          | <i>CUST_497_P1416408490</i>   | 0.778    |
|                 | THBS4              | <i>A_24_P260443</i>           | 0.794    | LIX1 (Probe 1)      | <i>A_24_P226241</i>           | 0.830    | AVP                          | <i>A_23_P109133</i>           | 0.773    |
|                 | GLUD2              | <i>CUST_287_P1416408490</i>   | 0.793    | SLC14A1             | <i>A_23_P55616</i>            | 0.829    | AVP                          | <i>CUST_16470_P1416261804</i> | 0.765    |
|                 | GLUD1              | <i>A_23_P138665</i>           | 0.782    | PSAT1               | <i>CUST_8157_P1416261804</i>  | 0.806    | SIM1                         | <i>A_23_P214743</i>           | 0.513    |
|                 | HEYL               | <i>A_23_P430658</i>           | 0.776    | C12orf39            | <i>CUST_15484_P1416261804</i> | 0.806    | OTP                          | <i>A_23_P84230</i>            | 0.482    |
|                 | LUZP2              | <i>A_24_P649282</i>           | 0.752    | AQP4                | <i>A_24_P202522</i>           | 0.804    | FEZF1                        | <i>CUST_1423_P1416379584</i>  | 0.467    |
|                 | ZC3HAV1            | <i>A_23_P425224</i>           | 0.748    | GLUD1               | <i>A_23_P138665</i>           | 0.799    | TMEM114                      | <i>A_24_P728604</i>           | 0.444    |
|                 | A_32_P232413       | <i>A_32_P232413</i>           | 0.741    | LIX1 (Probe 2)      | <i>A_32_P116606</i>           | 0.798    | ECEL1                        | <i>CUST_5650_P1416261804</i>  | 0.442    |
|                 | ISOC1              | <i>A_23_P250982</i>           | 0.738    | RARRES3             | <i>A_23_P1962</i>             | 0.796    | <i>CUST_1286_P1416379584</i> | <i>CUST_1286_P1416379584</i>  | 0.433    |
| Top 10 negative | RTN4R              | <i>A_23_P132175</i>           | 0.632    | ATP4A               | <i>A_23_P430728</i>           | 0.689    | <i>A_24_P554040</i>          | <i>A_32_P171571</i>           | 0.323    |
|                 | PAK7               | <i>CUST_7963_P1416261804</i>  | 0.634    | KCNJ3               | <i>CUST_388_P1416408490</i>   | 0.697    | ITPKA                        | <i>CUST_9080_P1416261804</i>  | 0.323    |
|                 | SLC6A7             | <i>CUST_1075_P1416261804</i>  | 0.640    | MICAL2              | <i>A_23_P13442</i>            | 0.698    | KCNK1                        | <i>A_23_P126075</i>           | 0.324    |
|                 | KIAA1456           | <i>A_24_P59643</i>            | 0.641    | MICAL2              | <i>A_23_P24843</i>            | 0.705    | GPR22                        | <i>A_23_P20172</i>            | 0.324    |
|                 | KCNJ3              | <i>CUST_388_P1416408490</i>   | 0.646    | NEUROD1             | <i>CUST_14143_P1416261804</i> | 0.708    | CAMKK2                       | <i>A_32_P210390</i>           | 0.330    |
|                 | CAMKK2             | <i>A_23_P408830</i>           | 0.651    | ZNF238              | <i>A_24_P299663</i>           | 0.710    | CA7                          | <i>A_23_P106656</i>           | 0.333    |
|                 | CHRD               | <i>A_23_P502047</i>           | 0.659    | <i>A_32_P203232</i> | <i>A_32_P203232</i>           | 0.718    | ZNF385B                      | <i>A_32_P196438</i>           | 0.335    |
|                 | <i>A_32_P98423</i> | <i>A_32_P98423</i>            | 0.663    | NEUROD1             | <i>A_23_P209484</i>           | 0.718    | CAMKK2                       | <i>A_23_P408830</i>           | 0.344    |
|                 | ZNF238             | <i>A_24_P299663</i>           | 0.668    | <i>A_32_P85131</i>  | <i>A_32_P85131</i>            | 0.720    | ADCY1                        | <i>A_24_P577694</i>           | 0.351    |
|                 | GABRD              | <i>A_23_P309720</i>           | 0.679    | CHRD                | <i>A_23_P502047</i>           | 0.727    | GABRD                        | <i>A_23_P309720</i>           | 0.351    |

Note: Some genes had more than one probe feature in top 10 positive of negative correlations (e.g., OXT).

**Supplementary Table 4.** Cognitive correlates of oxytocin signaling pathway mRNA

| Keyword      | mRNA  |       |       |
|--------------|-------|-------|-------|
|              | OXTR  | CD38  | OXT   |
| Reward       | 0.349 | 0.319 | 0.246 |
| Monetary     | 0.277 | 0.261 | 0.234 |
| Anticipation | 0.257 | 0.253 | 0.193 |
| Motivation   | 0.236 | 0.205 | 0.249 |
| Incentive    | 0.234 | 0.214 | 0.186 |
| Dopaminergic | 0.192 | 0.218 | 0.205 |
| Losses       | 0.158 | 0.152 | 0.092 |
| Pain         | 0.11  | 0.15  | 0.091 |
| Punishment   | 0.151 | 0.144 | 0.158 |
| Unpleasant   | 0.136 | 0.079 | 0.229 |
| Seeking      | 0.121 | 0.125 | 0.083 |
| Sexual       | 0.137 | 0.109 | 0.258 |
| Fearful      | 0.121 | 0.068 | 0.257 |
| Neutral      | 0.108 | 0.058 | 0.25  |
| Facial       | 0.104 | 0.027 | 0.232 |

*Note.* Top 5 topic correlations for OXTR, CD38, and OXT brain mRNA maps submitted to NeuroSynth. Values represent Pearson's *r*.
